# Supplementary material
Source: HighWire-hosted journal article supplement (https://erj.ersjournals.com/content/55/1/1900798)

**[Online Data Supplement]**

**Prognostic factors associated with long-term mortality in 1,445 patients with  
nontuberculous mycobacterial pulmonary disease: a 15-year follow-up study**

Byung Woo Jhun, Seong Mi Moon, Kyeongman Jeon, O Jung Kwon, Heejin Yoo, Keumhee  
C. Carriere, Hee Jae Huh, Nam Yong Lee, Sung Jae Shin, Charles L. Daley, Won-Jung Koh

**Table S1** Characteristics of study patients according to etiology of nontuberculous mycobacteria

| Characteristics                                           | <i>M. avium</i><br>(n=655) | <i>M. intracellulare</i><br>(n=487) | <i>M. abscessus</i><br>(n=129) | <i>M. massiliense</i><br>(n=174) | p-value |
|-----------------------------------------------------------|----------------------------|-------------------------------------|--------------------------------|----------------------------------|---------|
| Age ≥65 years                                             | 218 (33)                   | 219 (45)                            | 35 (27)                        | 37 (21)                          | <0.001  |
| Male                                                      | 264 (40)                   | 220 (45)                            | 39 (30)                        | 35 (20)                          | <0.001  |
| Ex- or current smoker                                     | 181 (28)                   | 154 (32)                            | 24 (19)                        | 24 (14)                          | <0.001  |
| Body mass index <18.5 kg/m <sup>2</sup>                   | 94 (14)                    | 159 (33)                            | 28 (22)                        | 31 (18)                          | <0.001  |
| Underlying disease                                        |                            |                                     |                                |                                  |         |
| Previous pulmonary tuberculosis                           | 197 (30)                   | 212 (44)                            | 69 (54)                        | 88 (51)                          | <0.001  |
| Chronic obstructive pulmonary disease or bronchial asthma | 62 (9)                     | 76 (16)                             | 4 (3)                          | 5 (3)                            | <0.001  |
| Chronic pulmonary aspergillosis                           | 8 (1)                      | 11 (2)                              | 5 (4)                          | 7 (4)                            | 0.059   |
| Pulmonary malignancy                                      | 13 (2)                     | 27 (6)                              | 3 (2)                          | 2 (1)                            | 0.002   |
| Extra-pulmonary malignancy                                | 108 (17)                   | 73 (15)                             | 11 (9)                         | 16 (9)                           | 0.020   |
| Diabetes mellitus                                         | 54 (8)                     | 37 (8)                              | 4 (3)                          | 6 (4)                            | 0.042   |
| Chronic heart disease                                     | 64 (10)                    | 54 (11)                             | 6 (5)                          | 12 (7)                           | 0.093   |
| Chronic liver disease                                     | 49 (8)                     | 32 (6)                              | 8 (6)                          | 15 (9)                           | 0.781   |
| Symptom                                                   |                            |                                     |                                |                                  |         |
| Cough                                                     | 421 (64)                   | 363 (75)                            | 101 (78)                       | 143 (82)                         | <0.001  |
| Sputum                                                    | 450 (69)                   | 366 (75)                            | 107 (83)                       | 141 (81)                         | <0.001  |

|                                                     |            |            |            |            |        |
|-----------------------------------------------------|------------|------------|------------|------------|--------|
| Hemoptysis                                          | 123 (19)   | 94 (19)    | 48 (37)    | 59 (34)    | <0.001 |
| Erythrocyte sedimentation rate (mm/hr) <sup>¶</sup> | 27 (15–45) | 30 (17–59) | 33 (19–51) | 39 (20–57) | <0.001 |
| Sputum smear positivity                             | 244 (37)   | 252 (52)   | 93 (72)    | 112 (64)   | <0.001 |
| Radiological form                                   |            |            |            |            | <0.001 |
| Non-cavitary nodular bronchiectatic                 | 534 (82)   | 309 (63)   | 87 (67)    | 114 (65)   |        |
| Cavitary nodular bronchiectatic                     | 48 (7)     | 48 (10)    | 23 (18)    | 24 (14)    |        |
| Fibro-cavitary                                      | 73 (11)    | 130 (27)   | 19 (15)    | 36 (21)    |        |
| Treatment initiation                                | 361 (55)   | 342 (70)   | 70 (54)    | 120 (69)   | <0.001 |

Data are presented as no. (%) or median (interquartile range). <sup>¶</sup>n=1181 due to missing data.

**Table S2** Characteristics of study patients according to radiological form of nontuberculous mycobacteria

| Characteristics                                           | Non-cavitary nodular<br>bronchiectatic (n=1044) | Cavitary nodular<br>bronchiectatic (n=143) | Fibrocavitary<br>(n=258) | p-value |
|-----------------------------------------------------------|-------------------------------------------------|--------------------------------------------|--------------------------|---------|
| Age ≥65 years                                             | 360 (34)                                        | 44 (31)                                    | 105 (41)                 | 0.087   |
| Male                                                      | 350 (34)                                        | 33 (23)                                    | 175 (68)                 | <0.001  |
| Ex- or current smoker                                     | 222 (21)                                        | 26 (18)                                    | 135 (52)                 | <0.001  |
| Body mass index <18.5 kg/m <sup>2</sup>                   | 162 (16)                                        | 46 (32)                                    | 104 (40)                 | <0.001  |
| Underlying disease                                        |                                                 |                                            |                          |         |
| Previous pulmonary tuberculosis                           | 318 (30)                                        | 66 (46)                                    | 182 (71)                 | <0.001  |
| Chronic obstructive pulmonary disease or bronchial asthma | 73 (7)                                          | 8 (6)                                      | 66 (26)                  | <0.001  |
| Chronic pulmonary aspergillosis                           | 2 (1)                                           | 1 (1)                                      | 28 (11)                  | <0.001  |
| Pulmonary malignancy                                      | 24 (2)                                          | 0 (0)                                      | 21 (8)                   | <0.001  |
| Extra-pulmonary malignancy                                | 166 (16)                                        | 8 (6)                                      | 34 (13)                  | 0.004   |
| Diabetes mellitus                                         | 67 (6)                                          | 8 (6)                                      | 26 (10)                  | 0.094   |
| Chronic heart disease                                     | 109 (10)                                        | 13 (9)                                     | 14 (5)                   | 0.047   |
| Chronic liver disease                                     | 71 (7)                                          | 11 (8)                                     | 22 (9)                   | 0.612   |
| Symptom                                                   |                                                 |                                            |                          |         |
| Cough                                                     | 716 (69)                                        | 103 (72)                                   | 209 (81)                 | <0.001  |
| Sputum                                                    | 739 (71)                                        | 110 (77)                                   | 215 (83)                 | <0.001  |

|                                                     |            |            |            |        |
|-----------------------------------------------------|------------|------------|------------|--------|
| Hemoptysis                                          | 222 (21)   | 48 (34)    | 54 (21)    | 0.003  |
| Erythrocyte sedimentation rate (mm/hr) <sup>¶</sup> | 25 (15–42) | 39 (23–65) | 51 (23–75) | <0.001 |
| Sputum smear positivity                             | 387 (37)   | 101 (71)   | 213 (83)   | <0.001 |
| Etiology                                            |            |            |            | <0.001 |
| <i>M. avium</i>                                     | 534 (51)   | 48 (34)    | 73 (28)    |        |
| <i>M. intracellulare</i>                            | 309 (30)   | 48 (34)    | 130 (51)   |        |
| <i>M. abscessus</i>                                 | 87 (8)     | 23 (16)    | 19 (7)     |        |
| <i>M. massiliense</i>                               | 114 (11)   | 24 (16)    | 36 (14)    |        |
| Treatment initiation                                | 550 (53)   | 120 (84)   | 223 (86)   | <0.001 |

Data are presented as no. (%) or median (interquartile range). <sup>¶</sup>n=1181 due to missing data.

**Figure S1.** Cumulative survival rates of patients with nontuberculous mycobacterial pulmonary disease according to treatment initiation.

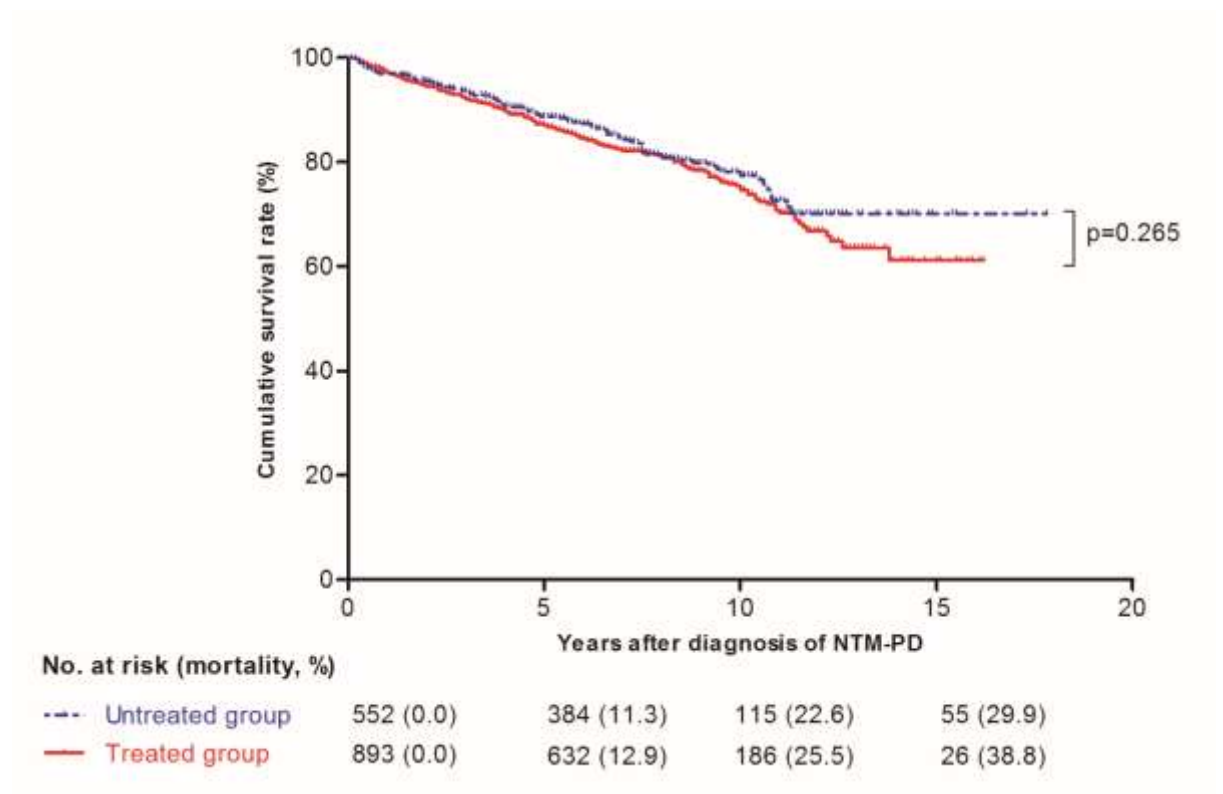

**Figure S2.** Cumulative survival rates of patients with nontuberculous mycobacterial pulmonary disease according to treatment initiation for the different etiologies. *M. avium* vs. *M. intracellulare* (A) and *M. massiliense* vs. *M. abscessus* (B).

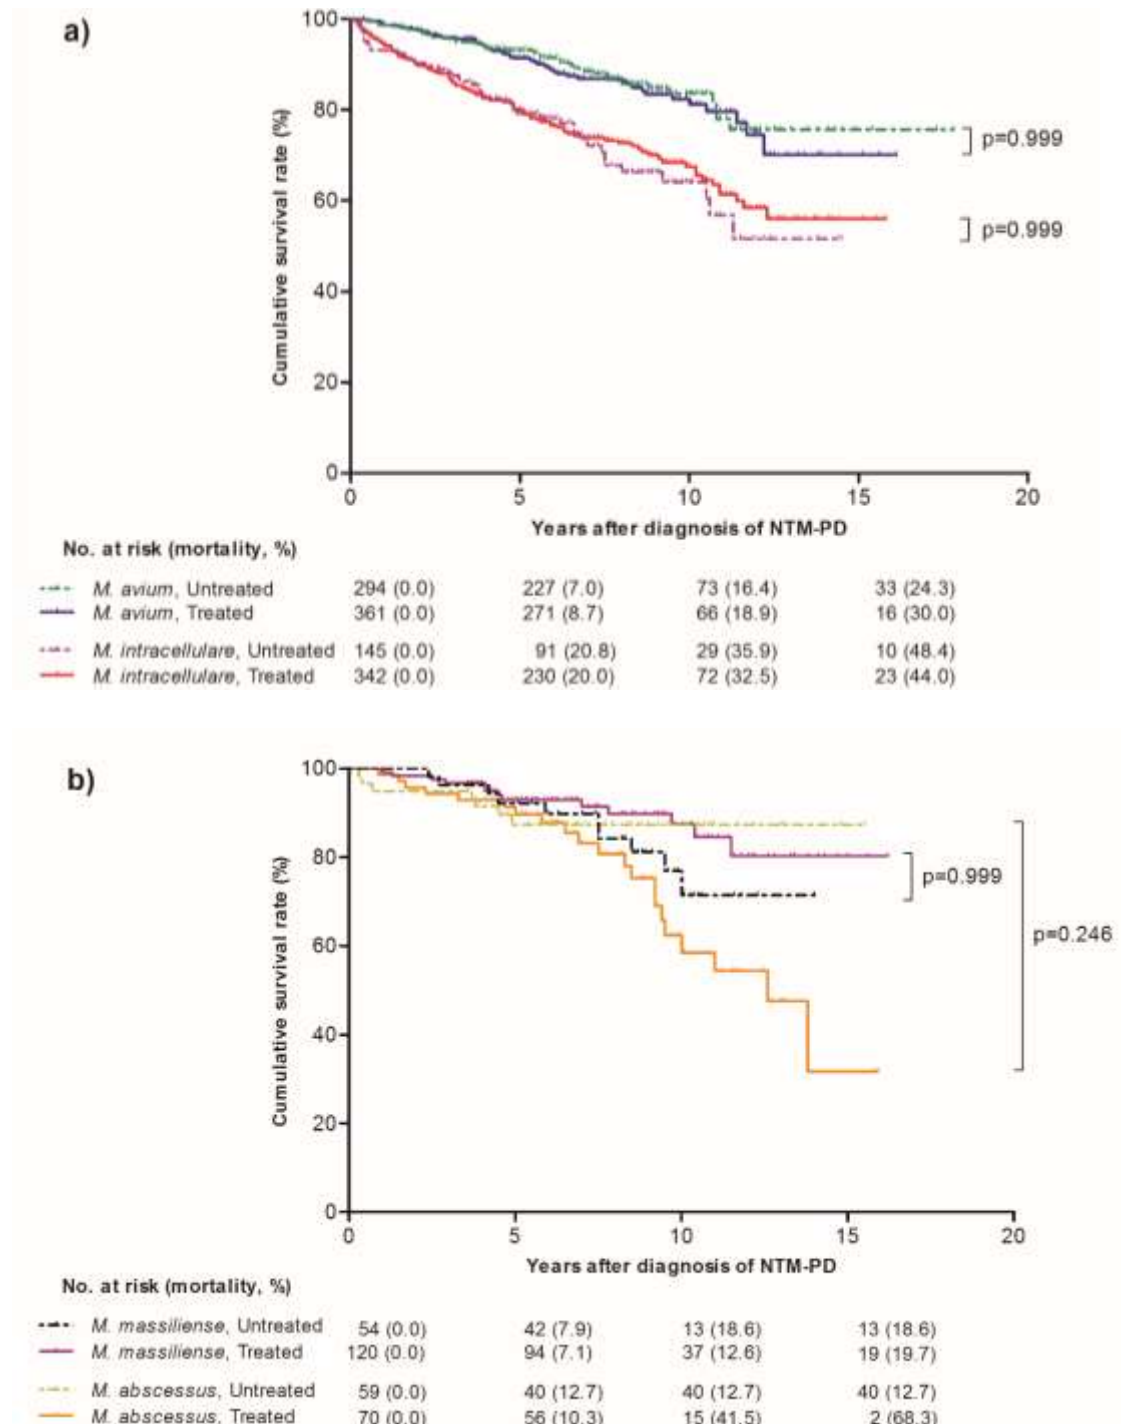

**Figure S3.** Cumulative survival rates of patients with nontuberculous mycobacterial pulmonary disease according to treatment initiation for the different radiological forms.

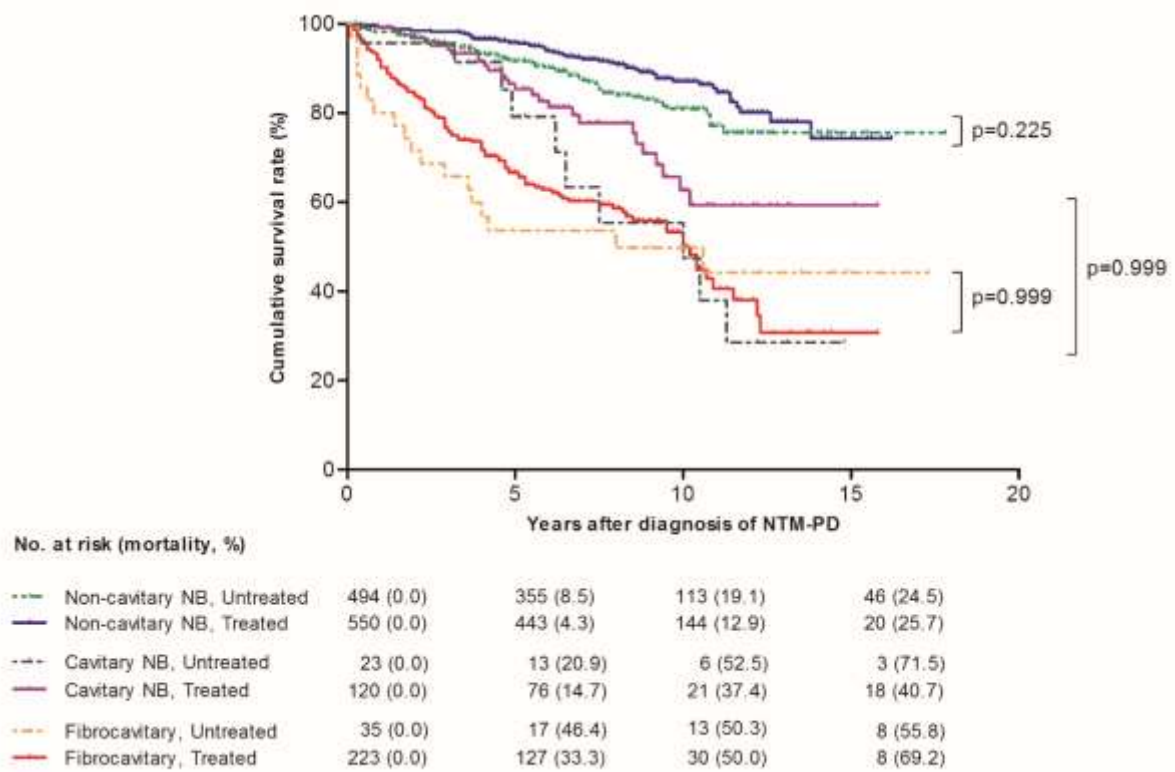

Supplement: inline-supplementary-material-1 [file inline-supplementary-material-1.pdf]
